# Supplementary material for: Feature Selection via Swarm Intelligence for Determining Protein Essentiality
Source: MDPI journal article supplement (doi:10.3390/molecules23071569), 2018-06-28
Supplement: s1 [file s1]

## Appendix A

**Table S1.** The parameter settings of classifiers contain Naïve Bayes, Sequential minimal optimization (SMO), J48, Logistic model trees (LMT), Random Forest, RandomTree and REPTree. All parameters are based on the WEKA software package.

| Classifiers  | Parameter Setting                                                                                                                                                                                        |
|--------------|----------------------------------------------------------------------------------------------------------------------------------------------------------------------------------------------------------|
| Naïve Bayes  | debug: False<br>useKernelEstimator: False                                                                                                                                                                |
| SMO          | Calibrator: Logistic<br>debug: False<br>kernel: PolyKernel<br>numFolds: -1<br>randomSeed: 1                                                                                                              |
| J48          | binarySplits: False<br>confidenceFactor: 0.25<br>debug: False<br>minNumObj: 2<br>numFolds: 3<br>reducedErrorPruning: False<br>saveInstanceData: False<br>seed: 1<br>unpruned: False<br>useLaplace: False |
| LMT          | convertNominal: False<br>debug: False<br>fastRegression: True<br>minNumInstances: 15<br>numBoostingIterations: -1<br>splitOnResiduals: False<br>useAIC: False<br>weightTrimBeta: 0.0                     |
| RandomForest | debug: False<br>maxDepth: 0<br>numFeatures: 0<br>seed: 1                                                                                                                                                 |
| RandomTree   | KValue: 0<br>debug: False<br>maxDepth: 0<br>minNum: 1.0<br>seed: 1                                                                                                                                       |

---

REPTree

debug: False

maxDepth: -1

minNum:2.0

minVarianceProp: 0.001

noPrunning: False

numFolds: 3

seed: 1

---
